# Supplementary material for: Nucleophilic Sulfur Dioxide Insertion Enabled Enantioselective Michael Additions to Access α-chiral Sulfones
Source: Research Square preprint supplement (doi:10.21203/rs.3.rs-5194636/v1), 2024-11-05

## checkCIF/PLATON report

Structure factors have been supplied for datablock(s) 1

THIS REPORT IS FOR GUIDANCE ONLY. IF USED AS PART OF A REVIEW PROCEDURE FOR PUBLICATION, IT SHOULD NOT REPLACE THE EXPERTISE OF AN EXPERIENCED CRYSTALLOGRAPHIC REFEREE.

No syntax errors found.      CIF dictionary      Interpreting this report

### Datablock: 1

---

Bond precision:      C-C = 0.0096 Å

Wavelength=1.54178

Cell:                      a=6.1777(2)                      b=9.1606(3)                      c=9.4231(3)  
                              alpha=108.188(1)                      beta=102.805(1)                      gamma=99.970(1)  
Temperature:              298 K

|                        | Calculated      | Reported        |
|------------------------|-----------------|-----------------|
| Volume                 | 476.83(3)       | 476.82(3)       |
| Space group            | P 1             | P 1             |
| Hall group             | P 1             | P 1             |
| Moiety formula         | C18 H26 N2 O4 S | ?               |
| Sum formula            | C18 H26 N2 O4 S | C18 H26 N2 O4 S |
| Mr                     | 366.47          | 366.47          |
| Dx, g cm <sup>-3</sup> | 1.276           | 1.276           |
| Z                      | 1               | 1               |
| Mu (mm <sup>-1</sup> ) | 1.713           | 1.713           |
| F000                   | 196.0           | 196.0           |
| F000'                  | 196.89          |                 |
| h,k,lmax               | 7,11,11         | 7,11,11         |
| Nref                   | 3498[ 1749]     | 3060            |
| Tmin,Tmax              | 0.720,0.722     |                 |
| Tmin'                  | 0.653           |                 |

Correction method= Not given

Data completeness= 1.75/0.87

Theta(max)= 68.436

R(reflections)= 0.0487( 3041)

wR2(reflections)=  
0.1298( 3060)

S = 0.949

Npar= 234

---

The following ALERTS were generated. Each ALERT has the format

**test-name\_ALERT\_alert-type\_alert-level.**

Click on the hyperlinks for more details of the test.

---

### Alert level C

|                   |                                                  |         |              |
|-------------------|--------------------------------------------------|---------|--------------|
| PLAT089_ALERT_3_C | Poor Data / Parameter Ratio (Zmax < 18) .....    | 7.36    | Note         |
| PLAT220_ALERT_2_C | NonSolvent Resd 1 C Ueq(max)/Ueq(min) Range      | 3.2     | Ratio        |
| PLAT241_ALERT_2_C | High 'MainMol' Ueq as Compared to Neighbors of   | C1      | Check        |
| PLAT241_ALERT_2_C | High 'MainMol' Ueq as Compared to Neighbors of   | C3      | Check        |
| PLAT241_ALERT_2_C | High 'MainMol' Ueq as Compared to Neighbors of   | C4      | Check        |
| PLAT241_ALERT_2_C | High 'MainMol' Ueq as Compared to Neighbors of   | C6      | Check        |
| PLAT242_ALERT_2_C | Low 'MainMol' Ueq as Compared to Neighbors of    | S1      | Check        |
| PLAT242_ALERT_2_C | Low 'MainMol' Ueq as Compared to Neighbors of    | C2      | Check        |
| PLAT242_ALERT_2_C | Low 'MainMol' Ueq as Compared to Neighbors of    | C5      | Check        |
| PLAT242_ALERT_2_C | Low 'MainMol' Ueq as Compared to Neighbors of    | C7      | Check        |
| PLAT250_ALERT_2_C | Large U3/U1 Ratio for <U(i,j)> Tensor(Resd 1)    | 2.1     | Note         |
| PLAT340_ALERT_3_C | Low Bond Precision on C-C Bonds .....            | 0.00962 | Ang.         |
| PLAT360_ALERT_2_C | Short C(sp3)-C(sp3) Bond C3 - C4 .               | 1.35    | Ang.         |
| PLAT362_ALERT_2_C | Short C(sp3)-C(sp2) Bond C1 - C6 .               | 1.34    | Ang.         |
| PLAT410_ALERT_2_C | Short Intra H...H Contact H3A ..H4B .            | 1.92    | Ang.         |
|                   | x,y,z = 1_555                                    | Check   |              |
| PLAT410_ALERT_2_C | Short Intra H...H Contact H3B ..H4A .            | 1.92    | Ang.         |
|                   | x,y,z = 1_555                                    | Check   |              |
| PLAT481_ALERT_4_C | Long D...A H-Bond Reported C12 ..O1 .            | 3.76    | Ang.         |
| PLAT482_ALERT_4_C | Small D-H..A Angle Rep for C15 ..O4 .            | 95.10   | Degree       |
| PLAT911_ALERT_3_C | Missing FCF Refl Between Thmin & STh/L= 0.600    | 25      | Report       |
|                   | -2 -1 1, -4 0 1, 0 1 1, 4 3 1, 0 5 1, -1 -2 2,   |         |              |
|                   | 0 1 2, 0 2 2, -1 3 2, 0 3 2, 1 3 2, 0 1 3,       |         |              |
|                   | -4 2 3, -3 2 3, -1 2 3, 0 1 4, -1 2 4, 0 2 4,    |         |              |
|                   | -1 1 5, -2 4 5, -1 4 5, -1 2 6, -1 0 7, 0 0 7,   |         |              |
|                   | -2 1 7,                                          |         |              |
| PLAT915_ALERT_3_C | No Flack x Check Done: Low Friedel Pair Coverage | 76      | %            |
| PLAT927_ALERT_1_C | Reported and Calculated wR2 Differ by .....      | 0.0014  | Check        |
| PLAT987_ALERT_1_C | The Flack x is >> 0 - Do a BASF/TWIN Refinement  |         | Please Check |

---

### Alert level G

|                   |                                                  |        |        |
|-------------------|--------------------------------------------------|--------|--------|
| PLAT003_ALERT_2_G | Number of Uiso or Uij Restrained non-H Atoms ... | 6      | Report |
| PLAT033_ALERT_4_G | Flack x Value Deviates > 3.0 * sigma from Zero . | 0.167  | Note   |
| PLAT154_ALERT_1_G | The s.u.'s on the Cell Angles are Equal ..(Note) | 0.001  | Degree |
| PLAT177_ALERT_4_G | The CIF-Embedded .res File Contains DELU Records | 2      | Report |
| PLAT186_ALERT_4_G | The CIF-Embedded .res File Contains ISOR Records | 1      | Report |
| PLAT192_ALERT_3_G | A Non-default DELU Restraint Value for First Par | 0.0080 | Report |
| PLAT343_ALERT_2_G | Unusual sp? Angle Range in Main Residue for      | C10    | Check  |
| PLAT367_ALERT_2_G | Long? C(sp?)-C(sp?) Bond C10 - C11 .             | 1.52   | Ang.   |
| PLAT367_ALERT_2_G | Long? C(sp?)-C(sp?) Bond C10 - C12 .             | 1.52   | Ang.   |
| PLAT480_ALERT_4_G | Long H...A H-Bond Reported H11C ..O4 .           | 2.64   | Ang.   |
| PLAT480_ALERT_4_G | Long H...A H-Bond Reported H18A ..O3 .           | 2.66   | Ang.   |
| PLAT480_ALERT_4_G | Long H...A H-Bond Reported H12A ..O1 .           | 2.85   | Ang.   |
| PLAT480_ALERT_4_G | Long H...A H-Bond Reported H15B ..O4 .           | 2.62   | Ang.   |
| PLAT480_ALERT_4_G | Long H...A H-Bond Reported H18A ..O3 .           | 2.66   | Ang.   |
| PLAT480_ALERT_4_G | Long H...A H-Bond Reported H11C ..O4 .           | 2.64   | Ang.   |
| PLAT480_ALERT_4_G | Long H...A H-Bond Reported H16 ..O2 .            | 2.62   | Ang.   |
| PLAT480_ALERT_4_G | Long H...A H-Bond Reported H18A ..O3 .           | 2.66   | Ang.   |
| PLAT480_ALERT_4_G | Long H...A H-Bond Reported H11C ..O4 .           | 2.64   | Ang.   |

|                   |                                                            |      |   |              |
|-------------------|------------------------------------------------------------|------|---|--------------|
| PLAT480_ALERT_4_G | Long H...A H-Bond Reported H16                             | ..02 | . | 2.62 Ang.    |
| PLAT480_ALERT_4_G | Long H...A H-Bond Reported H18A                            | ..03 | . | 2.66 Ang.    |
| PLAT480_ALERT_4_G | Long H...A H-Bond Reported H11C                            | ..04 | . | 2.64 Ang.    |
| PLAT480_ALERT_4_G | Long H...A H-Bond Reported H16                             | ..02 | . | 2.62 Ang.    |
| PLAT480_ALERT_4_G | Long H...A H-Bond Reported H11C                            | ..04 | . | 2.64 Ang.    |
| PLAT480_ALERT_4_G | Long H...A H-Bond Reported H16                             | ..02 | . | 2.62 Ang.    |
| PLAT860_ALERT_3_G | Number of Least-Squares Restraints .....                   |      |   | 41 Note      |
| PLAT883_ALERT_1_G | No Info/Value for _atom_sites_solution_primary .           |      |   | Please Do !  |
| PLAT912_ALERT_4_G | Missing # of FCF Reflections Above STh/L= 0.600            |      |   | 1 Note       |
| PLAT933_ALERT_2_G | Number of HKL-OMIT Records in Embedded .res File           |      |   | 2 Note       |
|                   | 1 2 -2, -1 -2 2,                                           |      |   |              |
| PLAT961_ALERT_5_G | Dataset Contains no Negative Intensities .....             |      |   | Please Check |
| PLAT965_ALERT_2_G | The SHELXL WEIGHT Optimisation has not Converged           |      |   | Please Check |
| PLAT969_ALERT_5_G | The 'Henn et al.' R-Factor-gap value .....                 |      |   | 3.71 Note    |
|                   | Predicted wR2: Based on SigI**2 3.50 or SHELX Weight 14.23 |      |   |              |
| PLAT978_ALERT_2_G | Number C-C Bonds with Positive Residual Density.           |      |   | 2 Info       |

---

0 **ALERT level A** = Most likely a serious problem - resolve or explain  
 0 **ALERT level B** = A potentially serious problem, consider carefully  
 22 **ALERT level C** = Check. Ensure it is not caused by an omission or oversight  
 32 **ALERT level G** = General information/check it is not something unexpected

4 ALERT type 1 CIF construction/syntax error, inconsistent or missing data  
 21 ALERT type 2 Indicator that the structure model may be wrong or deficient  
 6 ALERT type 3 Indicator that the structure quality may be low  
 21 ALERT type 4 Improvement, methodology, query or suggestion  
 2 ALERT type 5 Informative message, check

---

It is advisable to attempt to resolve as many as possible of the alerts in all categories. Often the minor alerts point to easily fixed oversights, errors and omissions in your CIF or refinement strategy, so attention to these fine details can be worthwhile. In order to resolve some of the more serious problems it may be necessary to carry out additional measurements or structure refinements. However, the purpose of your study may justify the reported deviations and the more serious of these should normally be commented upon in the discussion or experimental section of a paper or in the "special\_details" fields of the CIF. checkCIF was carefully designed to identify outliers and unusual parameters, but every test has its limitations and alerts that are not important in a particular case may appear. Conversely, the absence of alerts does not guarantee there are no aspects of the results needing attention. It is up to the individual to critically assess their own results and, if necessary, seek expert advice.

### **Publication of your CIF in IUCr journals**

A basic structural check has been run on your CIF. These basic checks will be run on all CIFs submitted for publication in IUCr journals (*Acta Crystallographica*, *Journal of Applied Crystallography*, *Journal of Synchrotron Radiation*); however, if you intend to submit to *Acta Crystallographica Section C* or *E* or *IUCrData*, you should make sure that full publication checks are run on the final version of your CIF prior to submission.

### **Publication of your CIF in other journals**

Please refer to the *Notes for Authors* of the relevant journal for any special instructions relating to CIF submission.

Datablock 1 - ellipsoid plot

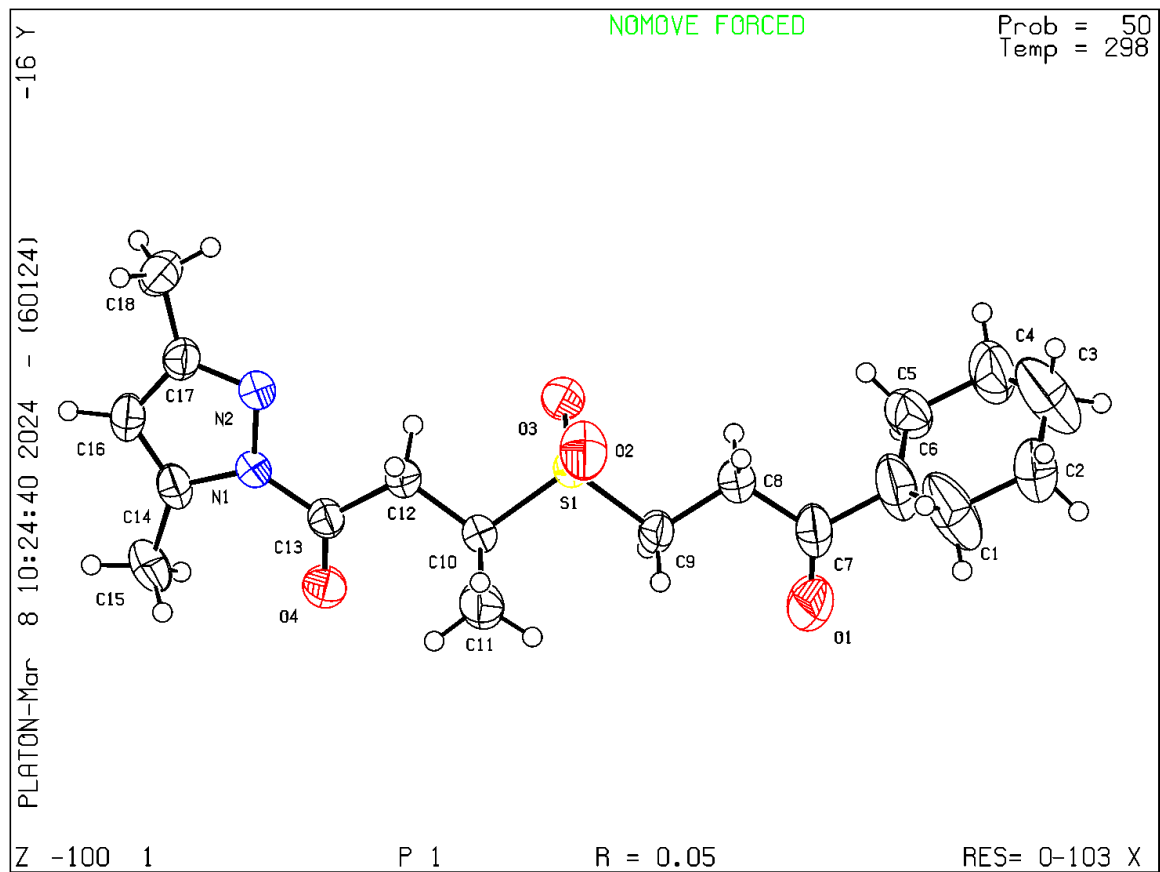

Supplement: Supplementary file 1 [file 4bc5b8c759426cb4df0799e2.pdf]
